# Supplementary material for: Electrocatalytic hydrogenation of furfural over copper nitride with enhanced hydrogen spillover performance
Source: Royal Society of Chemistry journal article supplement (doi:10.1039/d4gc01868k), 2024-01-01
Supplement: d4gc01868k1.pdf [file d4gc01868k1.pdf]

# Supporting Information

## Electrocatalytic hydrogenation of furfural over copper nitride with enhanced hydrogen spillover performance

*Huiming Wen<sup>1,#</sup>, Tianchun Li<sup>1,#</sup>, Ziyi Fan<sup>1</sup>, Yu Jing<sup>1,\*</sup>, Wenjun Zhang<sup>1,\*</sup> and Zupeng Chen<sup>1,\*</sup>*

<sup>1</sup>Jiangsu Co-Innovation Center of Efficient Processing and Utilization of Forest Resources, International Innovation Center for Forest Chemicals and Materials, College of Chemical Engineering, Nanjing Forestry University, Longpan Road 159, Nanjing 210037, China.

Email: \*[yujing@njfu.edu.cn](mailto:yujing@njfu.edu.cn); \*[zhangwj@njfu.edu.cn](mailto:zhangwj@njfu.edu.cn); \*[czp@njfu.edu.cn](mailto:czp@njfu.edu.cn)

<sup>#</sup>These authors contributed equally to this work.

### Table of Contents

**Supplementary Figures, Schemes and Tables: Page 2-24**

**References: Page 25**

## Supplementary Figures, Schemes and Tables

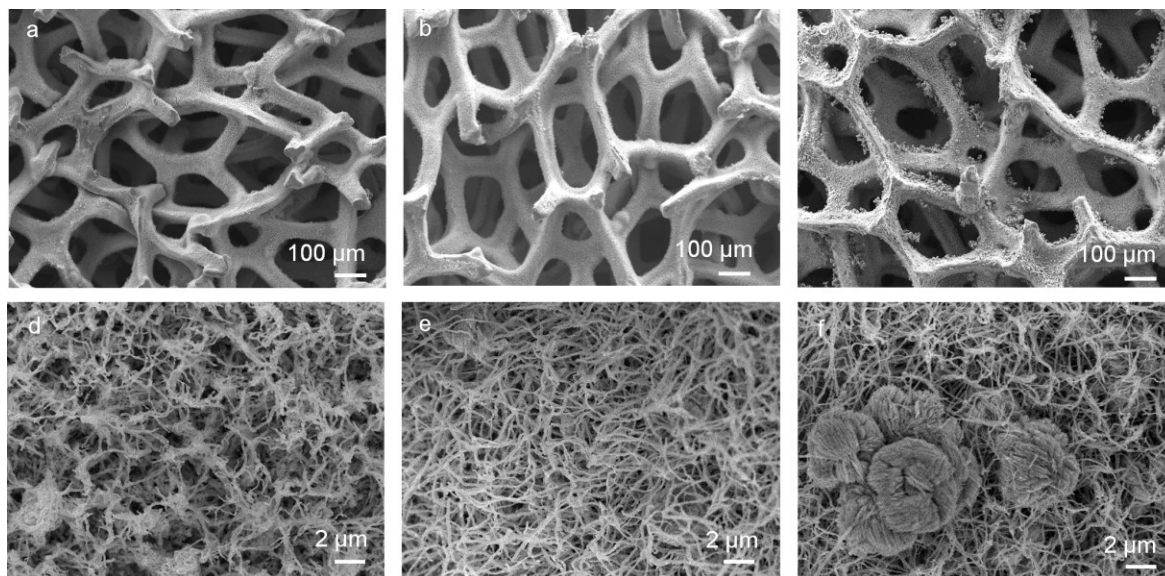

**Figure S1.** SEM images of (a, d) Cu<sub>3</sub>N Nw/CF<sub>10</sub>, (b, e) Cu<sub>3</sub>N Nw/CF, and (c, f) Cu<sub>3</sub>N Nw/CF<sub>30</sub>

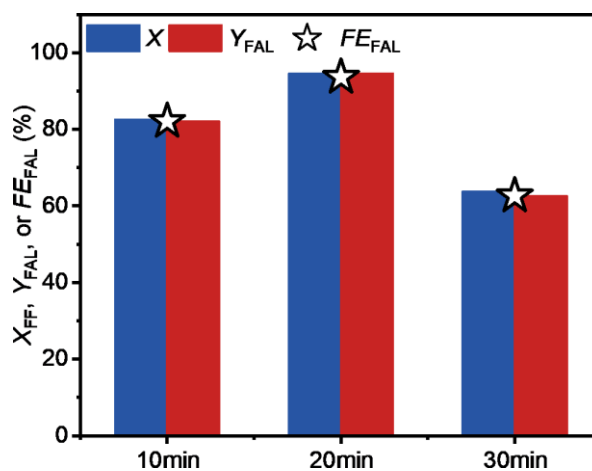

**Figure S2.** Performance of Cu<sub>3</sub>N catalysts with different chemical treatment times for the catalytic conversion of FF. (electrolyte of PBS containing 20 mM FF, pH = 7, at -0.55 V vs. RHE, passing charges of -154 C)

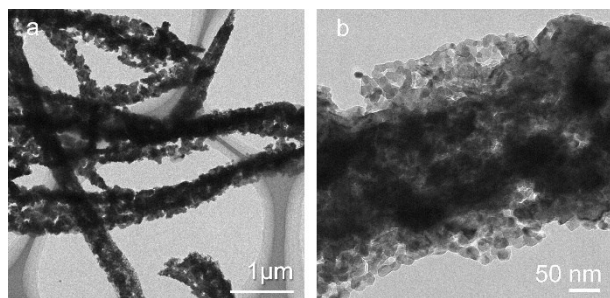

**Figure S3.** (a) TEM and (b) HRTEM images of  $\text{Cu}_3\text{N}$  Nw/CF.

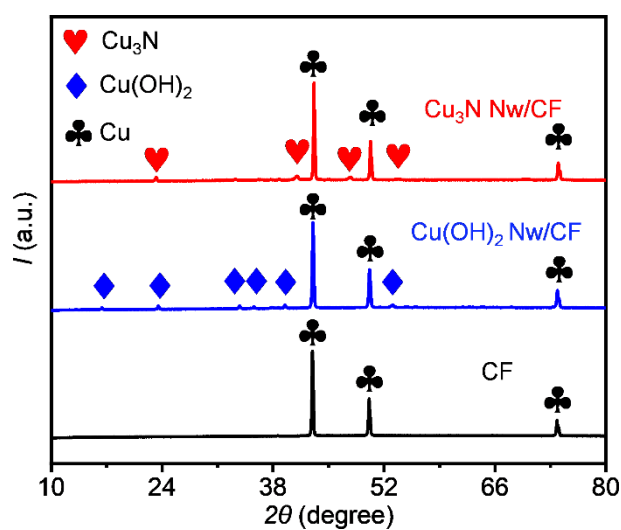

**Figure S4.** XRD patterns of CF,  $\text{Cu}(\text{OH})_2$  Nw/CF, and  $\text{Cu}_3\text{N}$  Nw/CF.

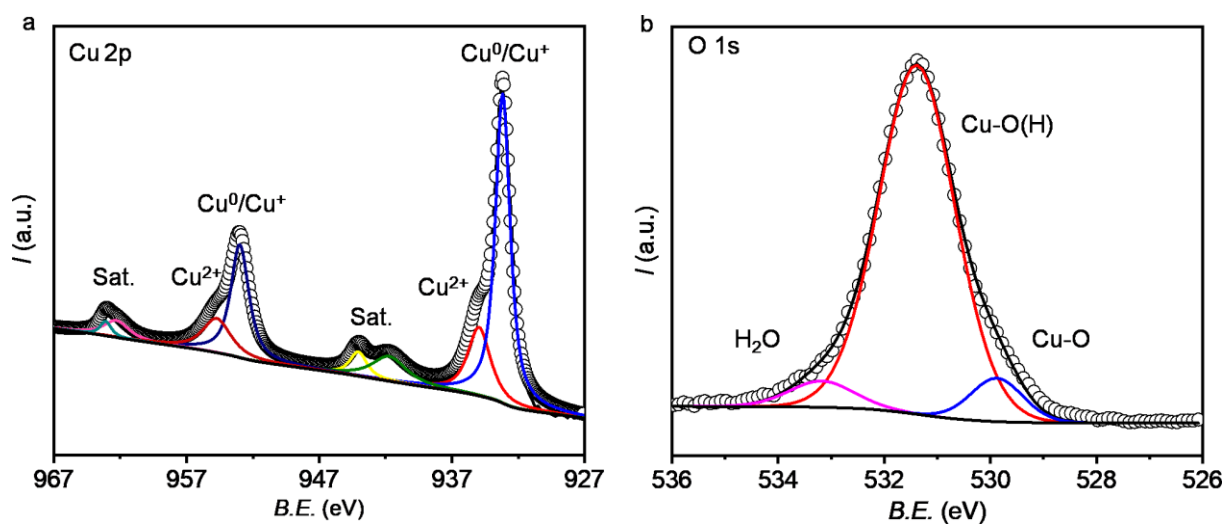

**Figure S5.** (a) Cu 2p and (b) O 1s XPS spectra of  $\text{Cu}_3\text{N}$  Nw/CF.

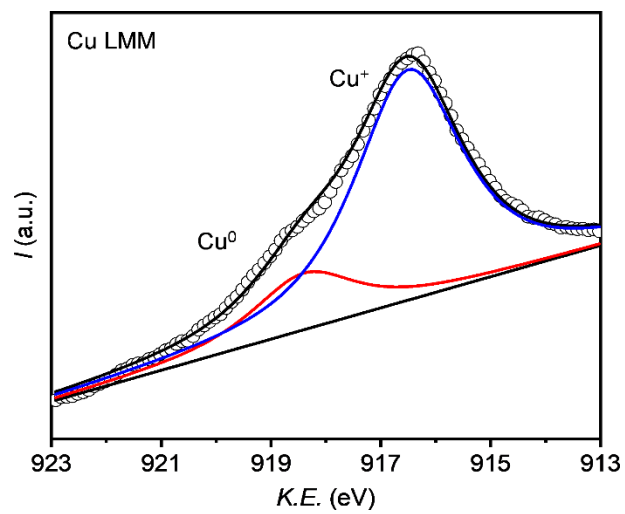

**Figure S6.** Cu LMM spectrum of  $\text{Cu}_3\text{N}$  Nw/CF.

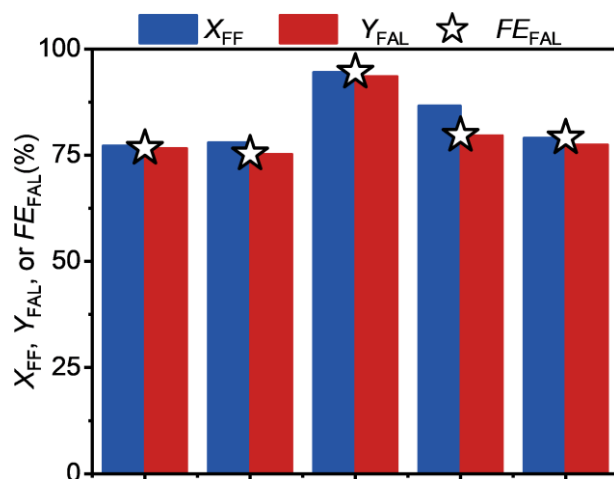

**Figure S7.** The dependence of the performance of ECH of FF-to-FAL upon pH of the PBS electrolyte over  $\text{Cu}_3\text{N}$  Nw/CF.

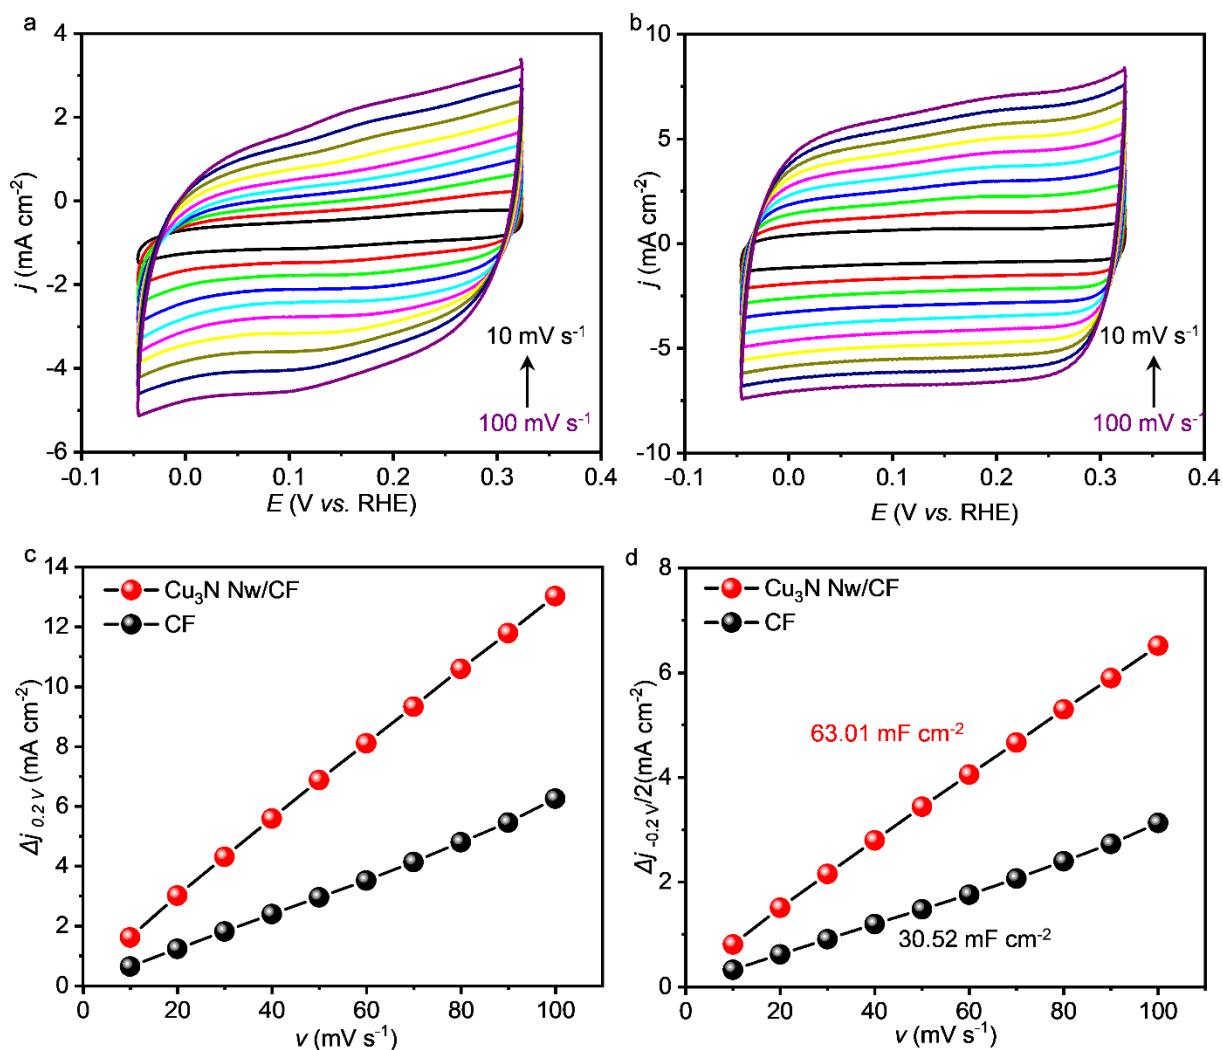

**Figure S8.** CV curves of (a) CF and (b) Cu<sub>3</sub>N Nw/CF at different scan rates in 1 M KOH solution. (c) Current density difference  $\Delta j$  ( $j_a - j_c$ ) at various scanning rates, and (d) double layer capacitance ( $C_{dl}$ ) measured by CV.

The specific capacitance ( $C_s$ ) was reported to be  $0.045 \text{ mF cm}^{-2}$ . The electrochemically active surface area of CF and Cu<sub>3</sub>N Nw/CF was calculated by  $ECSA = A * C / C_s$ , where  $C_s = 0.045 \text{ mF cm}^{-2}$ ,  $A =$  geometric area. The results of the calculations are presented in **Table S1**.

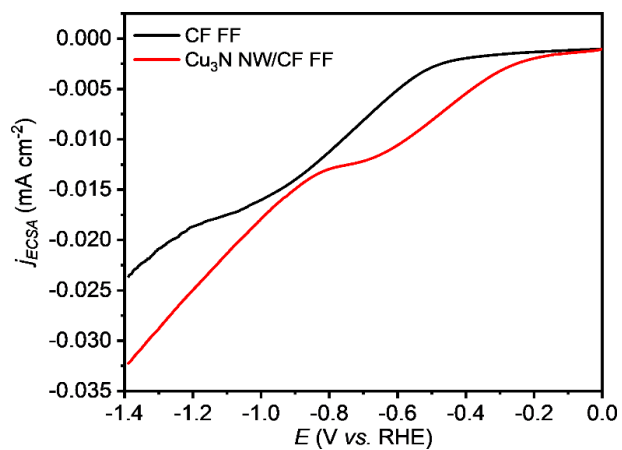

**Figure S9.** LSV curves of CF and Cu<sub>3</sub>N Nw/CF corrected by ECSA in 0.1 M PBS (pH = 7) with 20 mM FF.

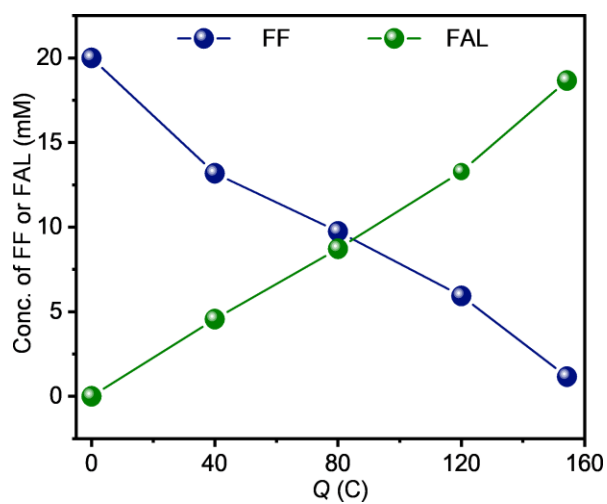

**Figure S10.** The corresponding concentration changes of FF and FAL with passing charges.

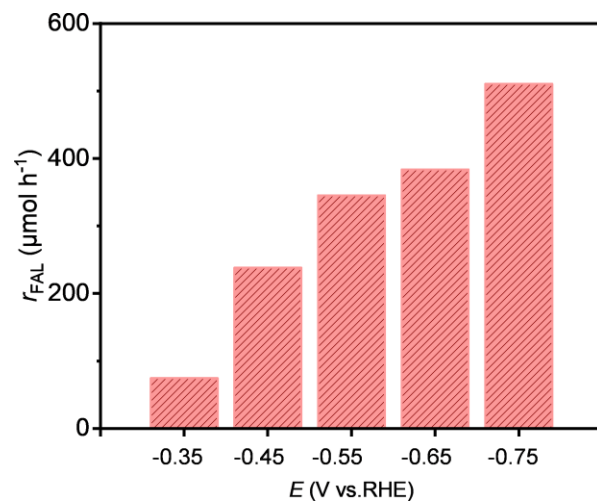

**Figure S11.** Generation rates of FAL over  $\text{Cu}_3\text{N}$  Nw/CF catalysts at different potentials.

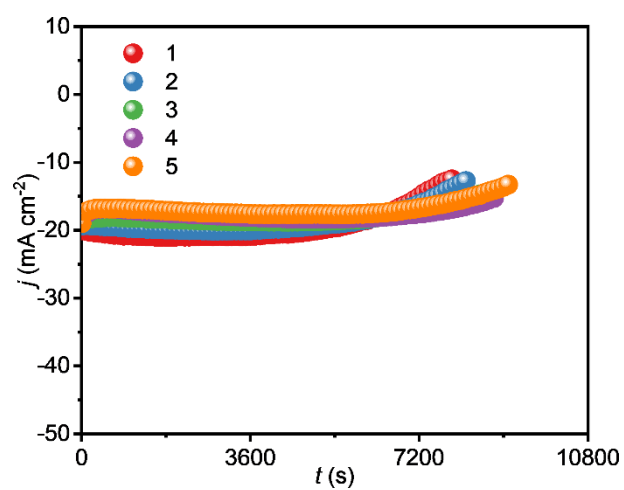

**Figure S12.** Chronoamperometric curves for  $\text{Cu}_3\text{N}$  Nw/CF catalyst. (electrolyte was a PBS solution containing 20 mM FF)

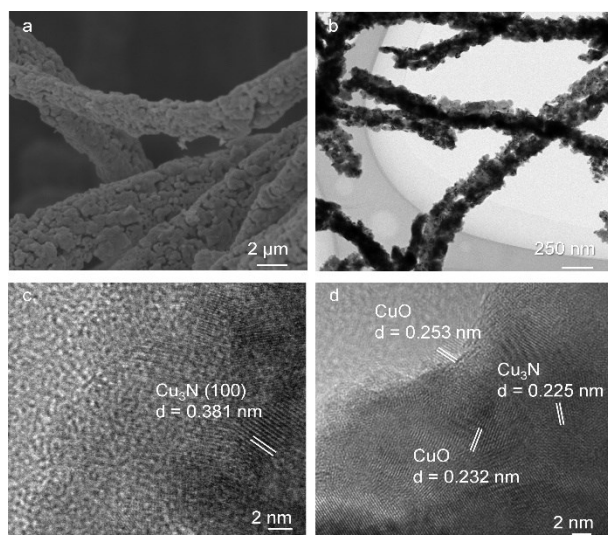

**Figure S13.** (a) SEM, and (b-d) (HR) TEM images of the used  $\text{Cu}_3\text{N}$  NW/CF.

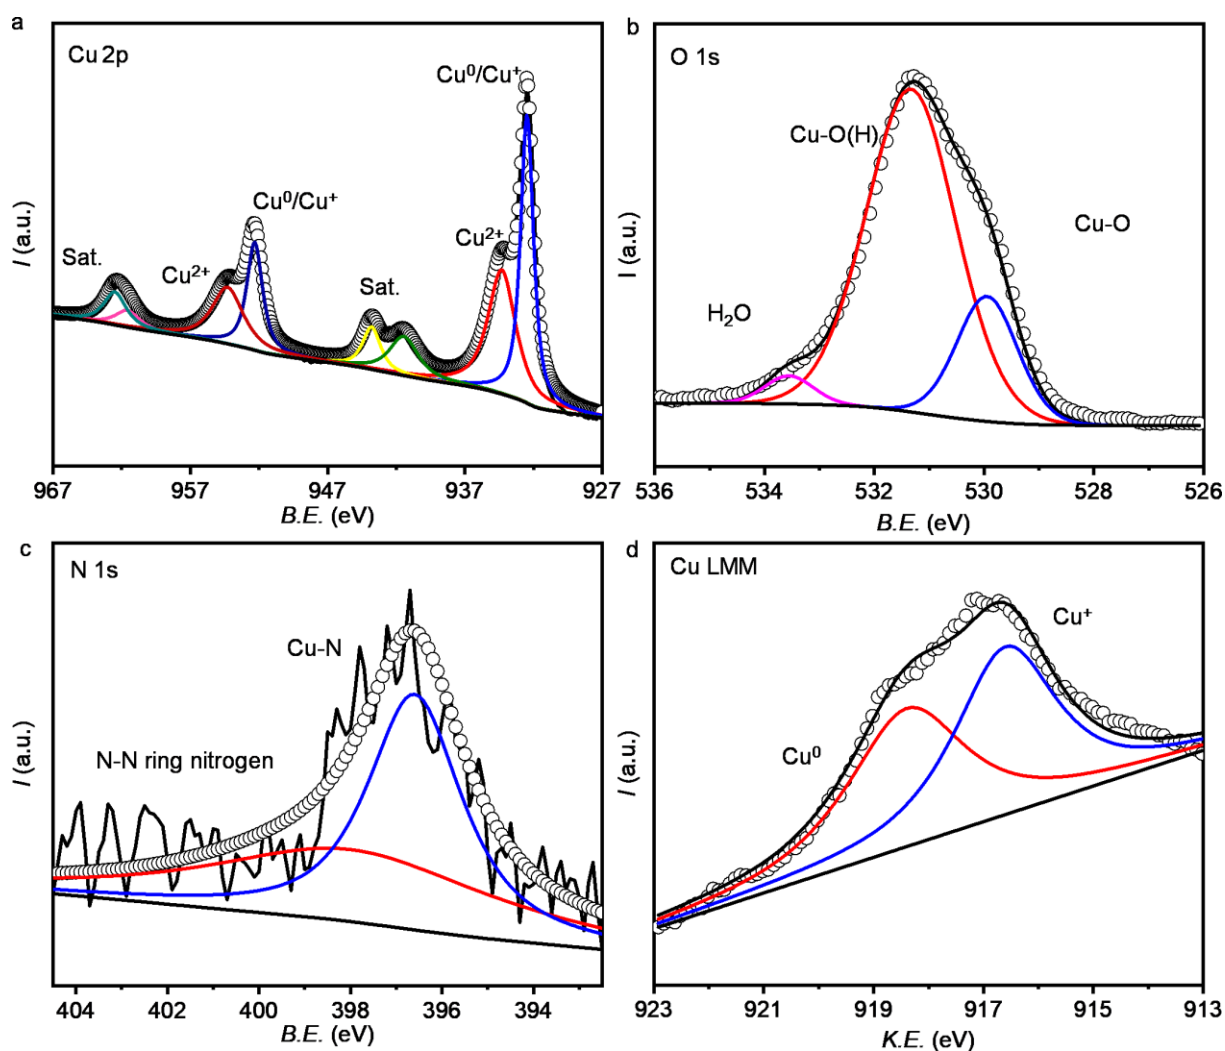

**Figure S14.** XPS spectra of (a)  $\text{Cu } 2p_{3/2}$ , (b)  $\text{O } 1s$ , (c)  $\text{N } 1s$ , and (d)  $\text{Cu LMM}$  spectra of the used  $\text{Cu}_3\text{N}$  NW/CF.



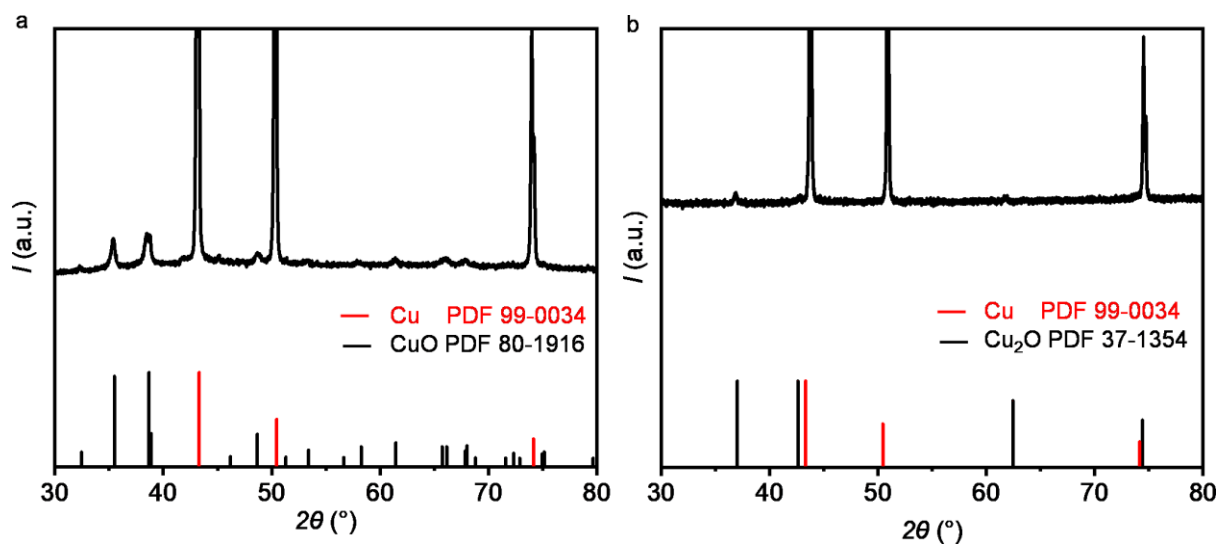

**Figure S15.** XRD patterns of (a) CuO Nw/CF, and (b)  $\text{Cu}_2\text{O}$ /CF.

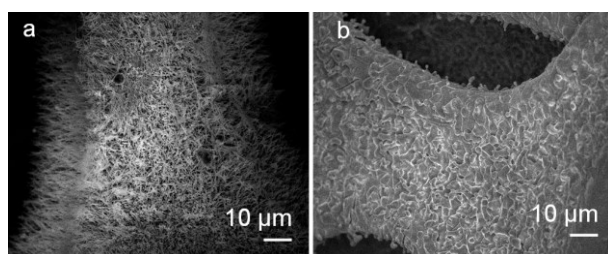

**Figure S16.** SEM images of (a) CuO Nw/CF, and (b)  $\text{Cu}_2\text{O}$ /CF.

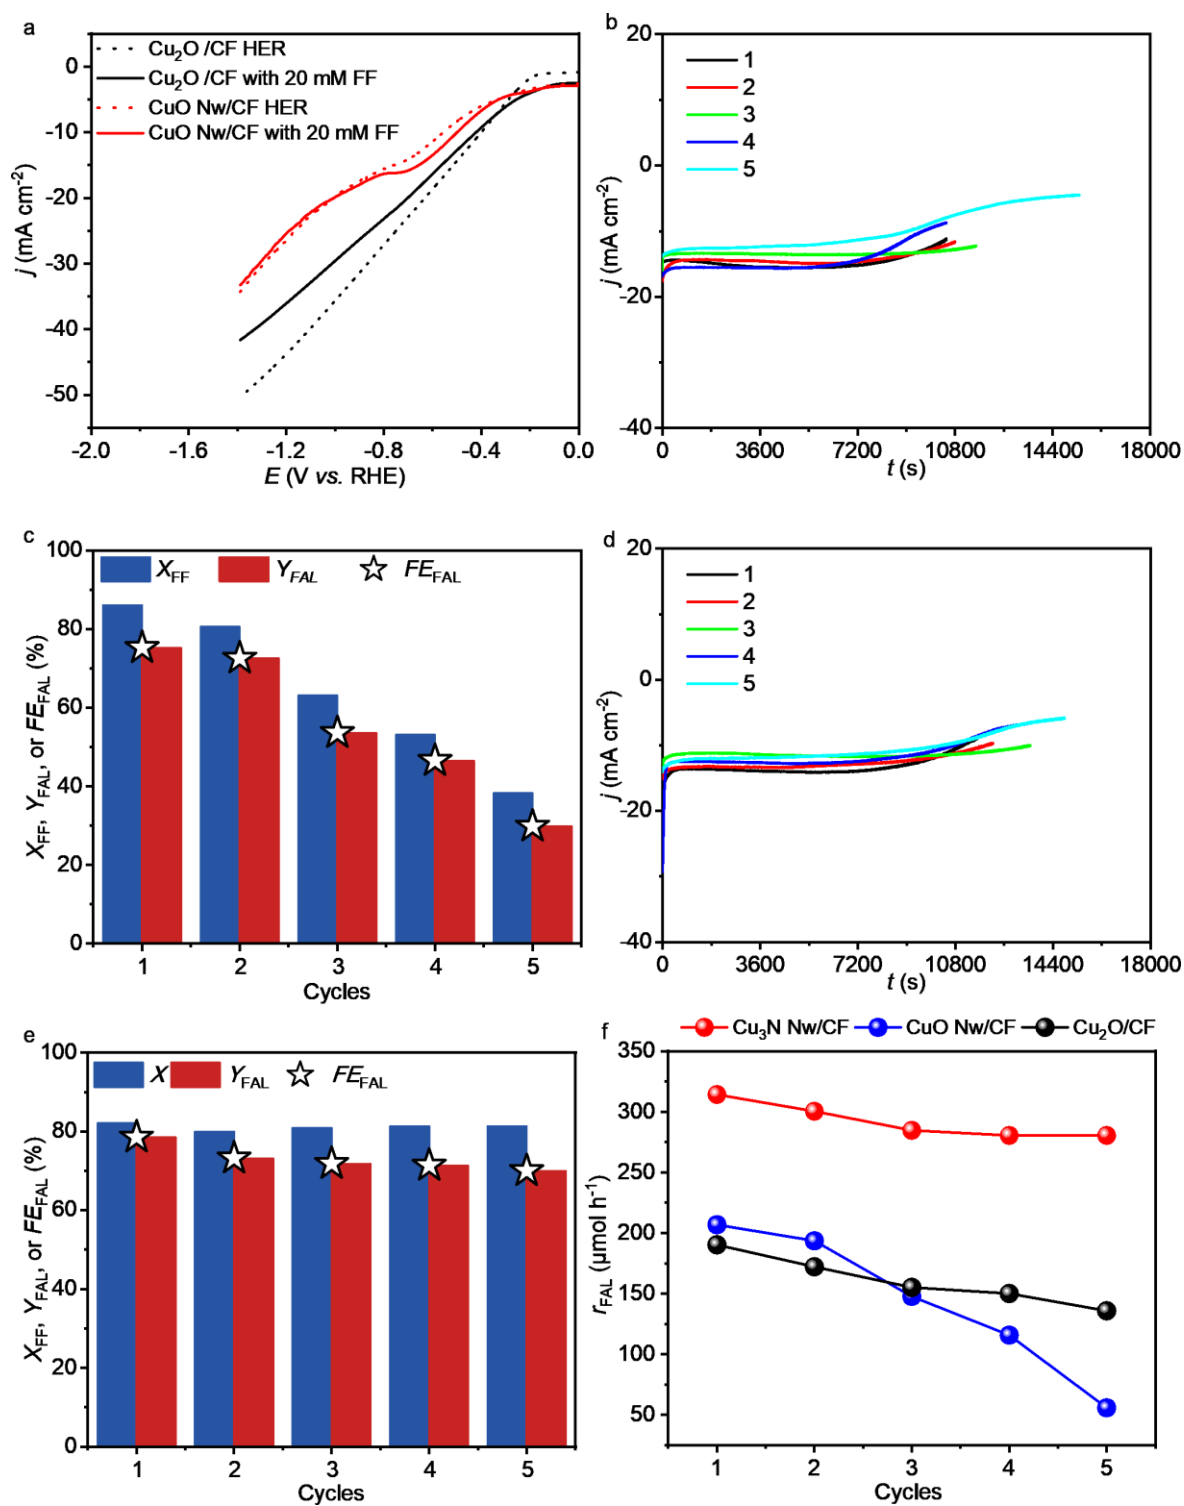

**Figure S17.** (a) LSV curves of CuO Nw/CF and Cu<sub>2</sub>O/CF before and after the addition of 20 mM FF. Chronoamperometric curves over (b) CuO Nw/CF, and (d) Cu<sub>2</sub>O/CF. ECH of FF activity over (c) CuO Nw/CF, and (e) Cu<sub>2</sub>O/CF. (f) Generation rates of FAL over CuO Nw/CF, Cu<sub>2</sub>O/CF and Cu<sub>3</sub>N Nw/CF. (electrolyte of PBS containing 20 mM FF, pH = 7, at -0.55 V vs. RHE, passing charges of -154 C)

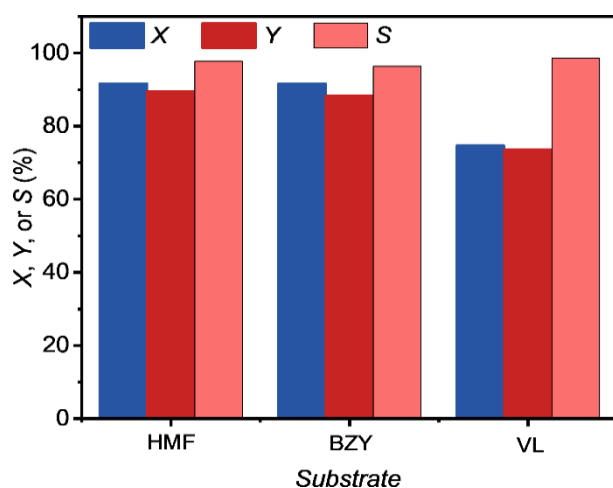

**Figure S18.** Hydrogenation activity of  $\text{Cu}_3\text{N}$  Nw/CF catalysts on other substrates (HMF, BZY, and VL,  $X$ ,  $Y$ ,  $S$  represent the conversion of substrate, yield and selectivity of the product, respectively). The products were the corresponding  $2e^-$  reduced alcohols, the electrolyte was a PBS solution containing 20 mM aldehyde, passing 154 C charge.

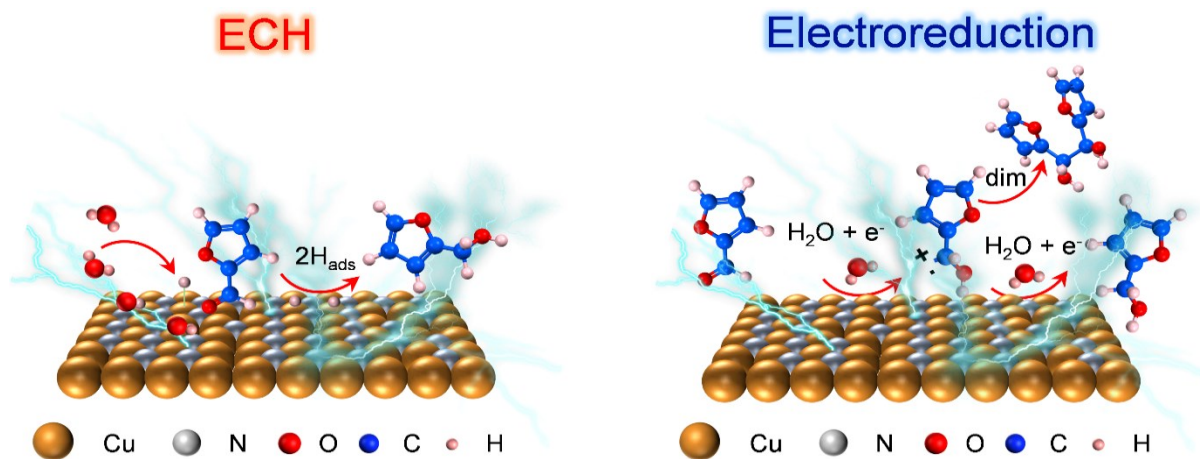

**Figure S19.** The schematic of ECH and electroreduction processes over  $\text{Cu}_3\text{N}$  Nw/CF catalyst.

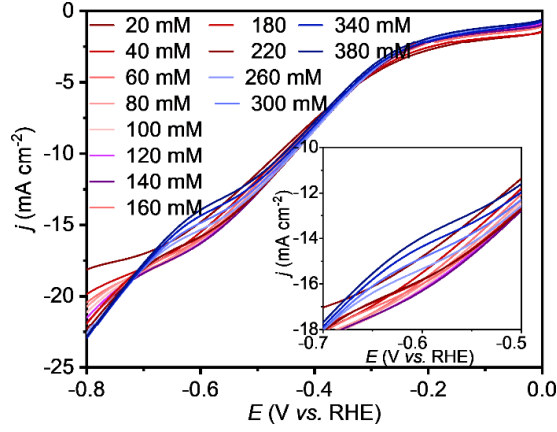

**Figure S20.** LSV curves for different concentrations of FF in 0.1M PBS over Cu<sub>3</sub>N NW/CF.

Our experiments have demonstrated that the adsorption competition between H<sub>3</sub>O<sup>+</sup> and furfural over Cu<sub>3</sub>N NW/CF catalysts involves. According to the work of Lopez-Ruiz,<sup>1</sup> the rate expression for the Langmuir-Hinshelwood (L-H) competitive adsorption of furfural and H<sub>3</sub>O<sup>+</sup> is as follows:

$$r_{\text{LH}} = \frac{k_{\text{T}} \cdot K_{\text{FF}} \cdot [\text{FF}] \cdot (K_{\text{H}} \cdot a_{\text{H}_3\text{O}^+})^2}{(1 + K_{\text{FF}} \cdot [\text{FF}] + K_{\text{H}} \cdot a_{\text{H}_3\text{O}^+})^3} \quad (9)$$

Where  $k_{\text{T}}$  is the kinetic constant of the hydrogenation step,  $K_{\text{FF}}$  is the adsorption equilibrium constant of the furfural,  $[\text{FF}]$  is the concentration of furfural,  $K_{\text{H}}$  is the adsorption equilibrium constant of H<sub>3</sub>O<sup>+</sup>, and  $a_{\text{H}_3\text{O}^+}$  is the activity of H<sub>3</sub>O<sup>+</sup>.

At low surface coverage (or low concentration) of furfural,  $K_{\text{FF}} \cdot [\text{FF}] \ll 1$ , the formula is simplified as below:

$$r_{\text{LH}} = \frac{k_{\text{T}} \cdot K_{\text{FF}} \cdot [\text{FF}] \cdot (K_{\text{H}} \cdot a_{\text{H}_3\text{O}^+})^2}{(1 + K_{\text{H}} \cdot a_{\text{H}_3\text{O}^+})^3} \quad (10)$$

**positive order** on furfural concentration.

At high surface coverage (or high concentration) of furfural,  $K_{\text{FF}} \cdot [\text{FF}] \gg 1$ , the formula is simplified as below:

$$r_{\text{LH}} = \frac{k_{\text{T}} \cdot (K_{\text{H}} \cdot a_{\text{H}_3\text{O}^+})^2}{(K_{\text{FF}} \cdot [\text{FF}])^2} \quad (11)$$

**negative order** on furfural concentration.

For the Eley-Rideal competitive adsorption of furfural and  $\text{H}_3\text{O}^+$  can expression for the as follow:

$$r_{\text{ER}} = \frac{k_{\text{T}} \cdot K_{\text{FF}} \cdot [\text{FF}] \cdot K_{\text{H}} \cdot a_{\text{H}_3\text{O}^+}^2}{1 + K_{\text{FF}} \cdot [\text{FF}] + K_{\text{H}} \cdot a_{\text{H}_3\text{O}^+}} \quad (12)$$

At low surface coverage (or low concentration) of furfural,  $K_{\text{FF}} \cdot [\text{FF}] \ll 1$ , the formula is simplified as:

$$r_{\text{ER}} = \frac{k_{\text{T}} \cdot K_{\text{FF}} \cdot [\text{FF}] \cdot K_{\text{H}} \cdot a_{\text{H}_3\text{O}^+}^2}{1 + K_{\text{H}} \cdot a_{\text{H}_3\text{O}^+}} \quad (13)$$

**positive order** on furfural concentration.

At high surface coverage (or high concentration) of furfural,  $K_{\text{FF}} \cdot [\text{FF}] \gg 1$ , the formula is simplified as:

$$r_{\text{ER}} = k_{\text{T}} \cdot a_{\text{H}_3\text{O}^+} \quad (14)$$

**zero order** on furfural concentration.

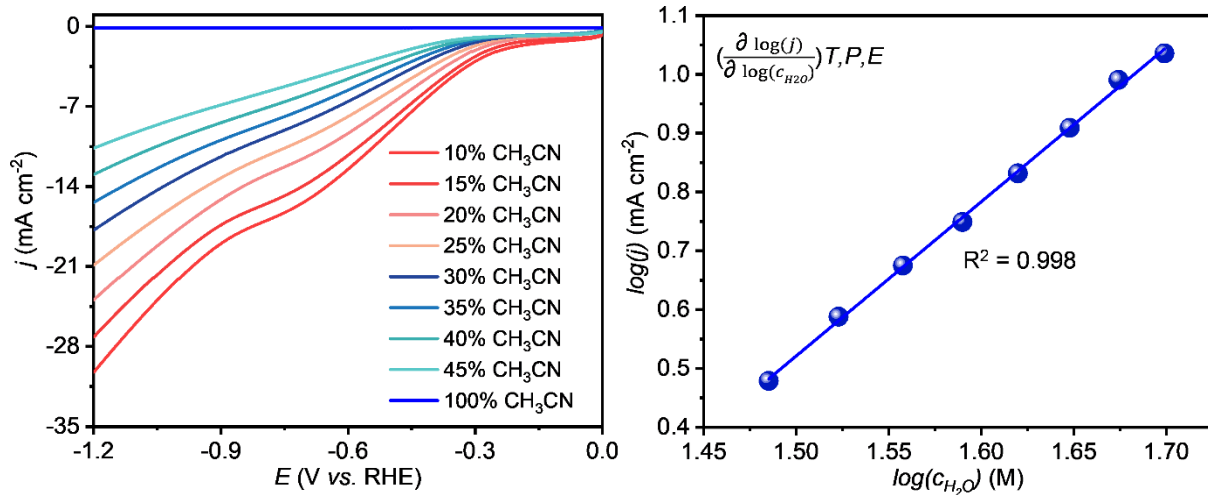

**Figure S21.** (a) LSV curves of different acetonitrile contents over  $\text{Cu}_3\text{N}$  Nw/CF in 0.1M PBS (pH = 7) containing 20 mM FF. (b) Correlation curve between water content and current density.

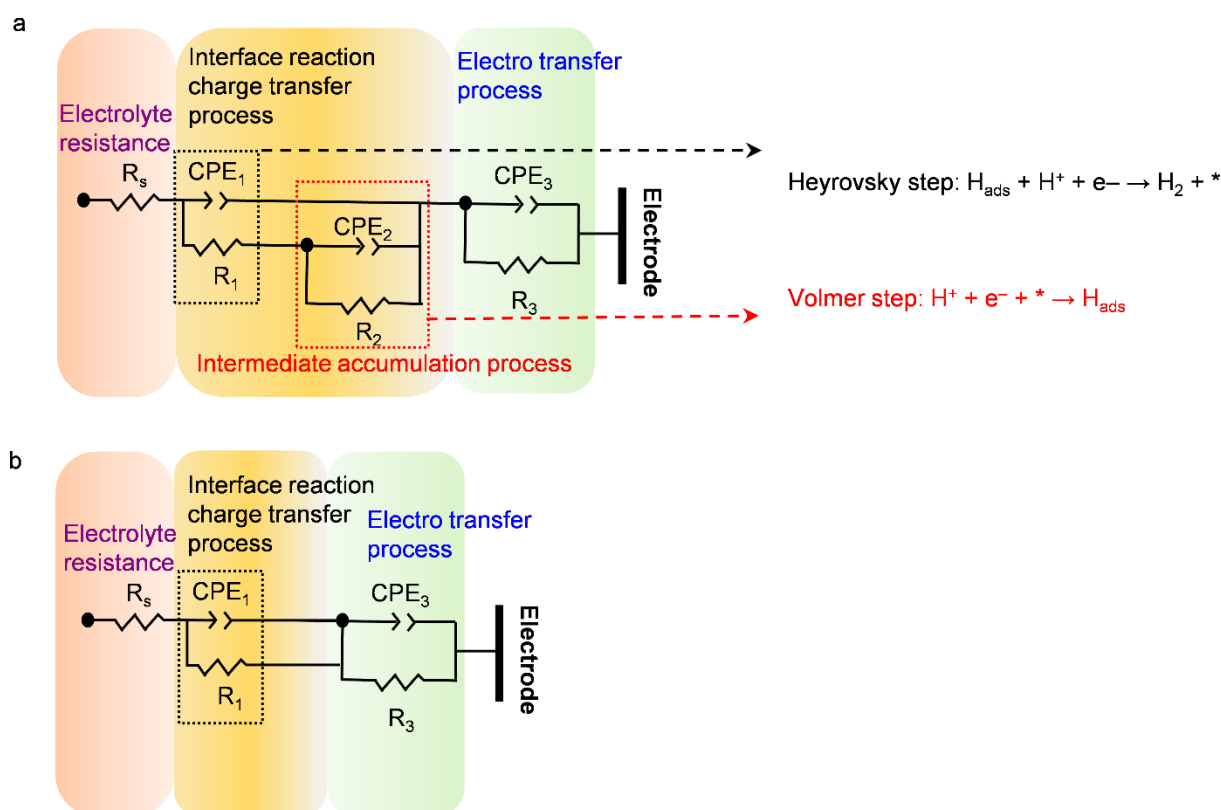

**Figure S22.** (a) Equivalent circuit diagram for CF and Cu<sub>3</sub>N Nw/CF. (b) Simplified equivalent circuit for CF and Cu<sub>3</sub>N Nw/CF at higher potential.

The equivalent circuit of CF and Cu<sub>3</sub>N Nw/CF consists of four parts: (1) electron transfer from the catalysts to the reaction interface, (2) the intermediate accumulation process at the reaction interface, (3) interfacial reaction charge transfer process and (4) electrolyte resistance. Since the low-frequency relaxation rapidly decreases to high frequencies at high potentials, the intermediate accumulation process can be neglected, and the equivalent circuit diagram is correspondingly simplified as **Figure S22b**.

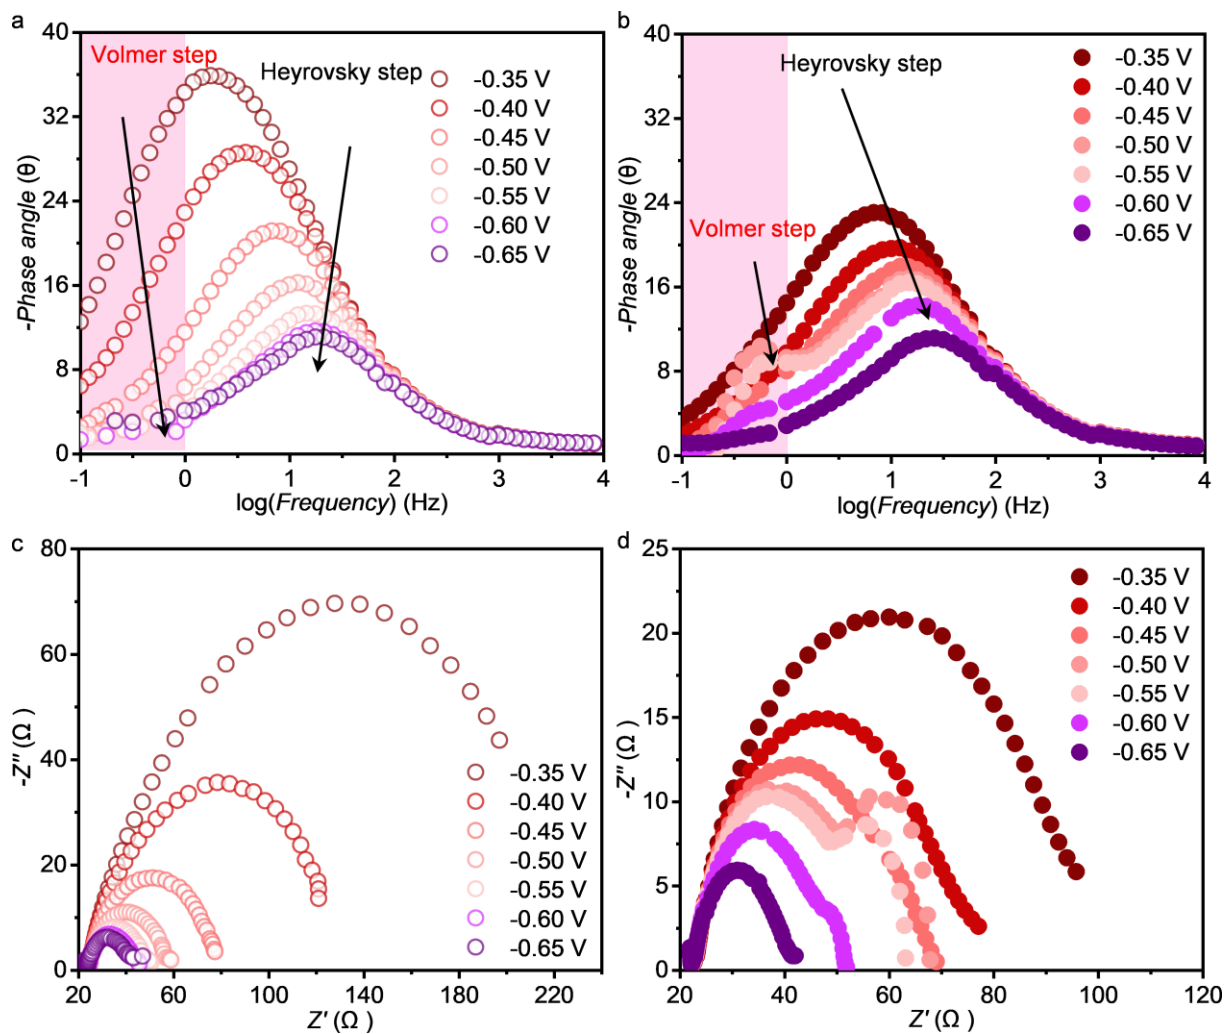

**Figure S23.** Bode plots for CF at different potentials in PBS (pH = 7) (a) without and (b) with the addition of 20 mM FF. Nyquist plots for CF at different potentials in PBS (pH = 7) (c) without and (d) with the addition of 20 mM FF.

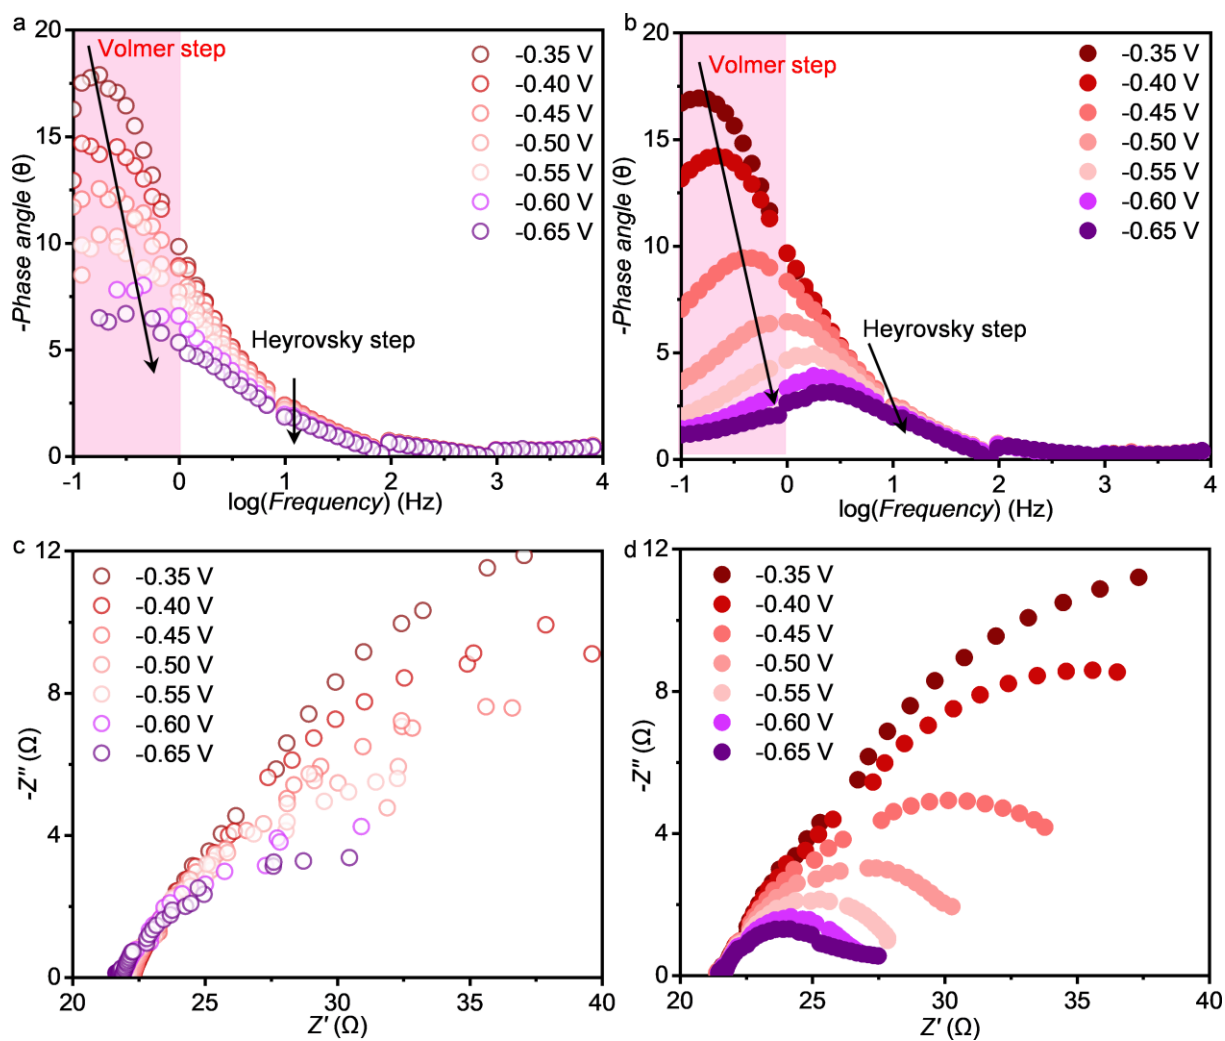

**Figure S24.** Bode plots for Cu<sub>3</sub>N Nw/CF at different potentials in PBS (pH = 7) (a) without and (b) with the addition of 20 mM FF. Nyquist plots for Cu<sub>3</sub>N Nw/CF at different potentials in PBS (pH = 7) (c) without and (d) with the addition of 20 mM FF.



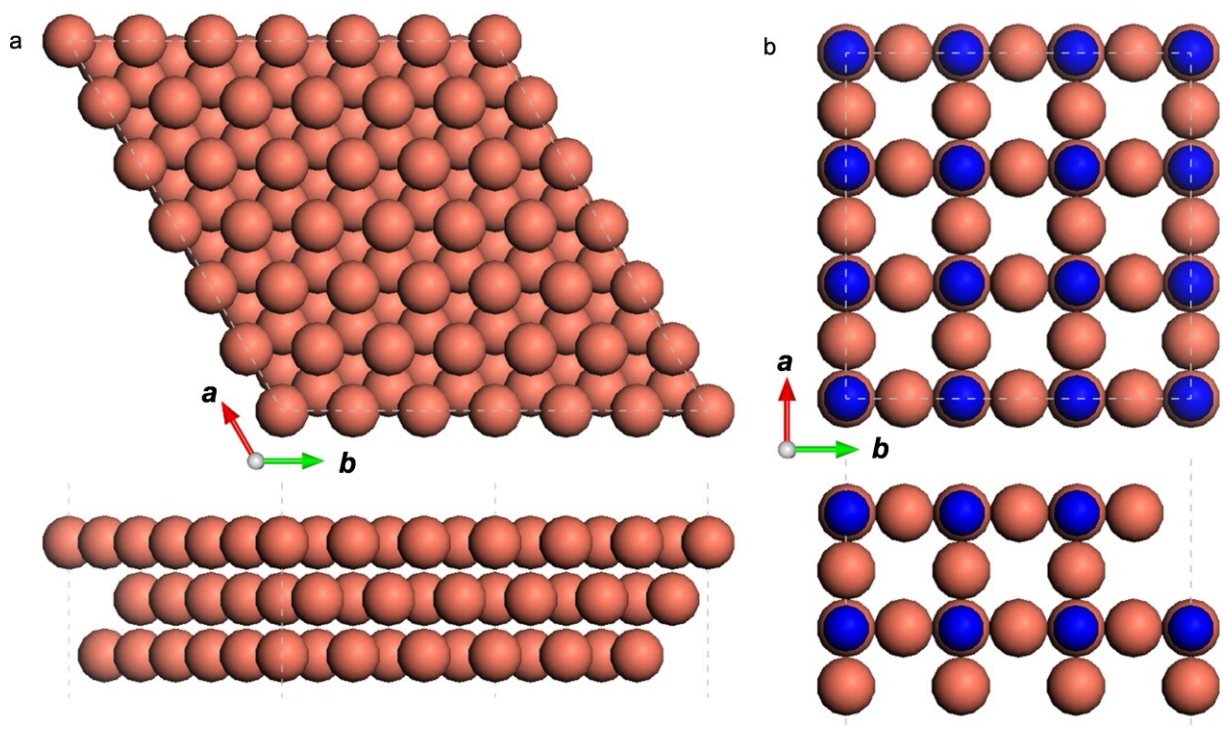

**Figure S25.** Structure schematics of (a) Cu(111) and (b) Cu<sub>3</sub>N(100) surfaces, in which the lattice of the 3×3×1 supercell is indicated by the gray dashed line. The orange and blue atoms represent Cu and N atoms, respectively.

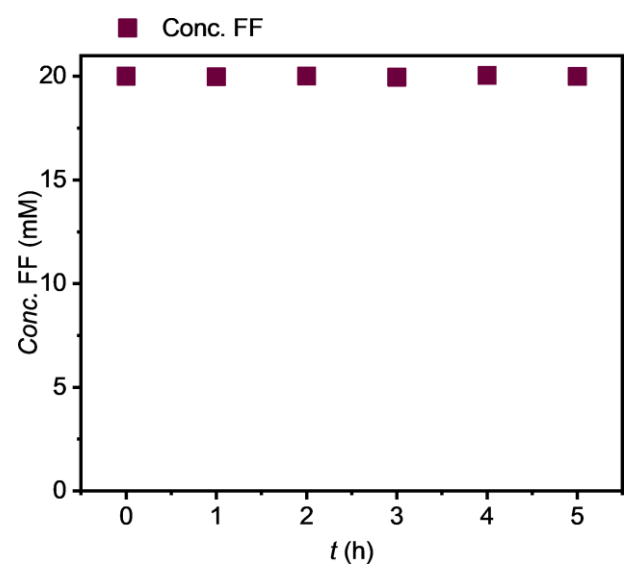

**Figure S26.** Stability of FF in 0.1M PBS (pH = 7)

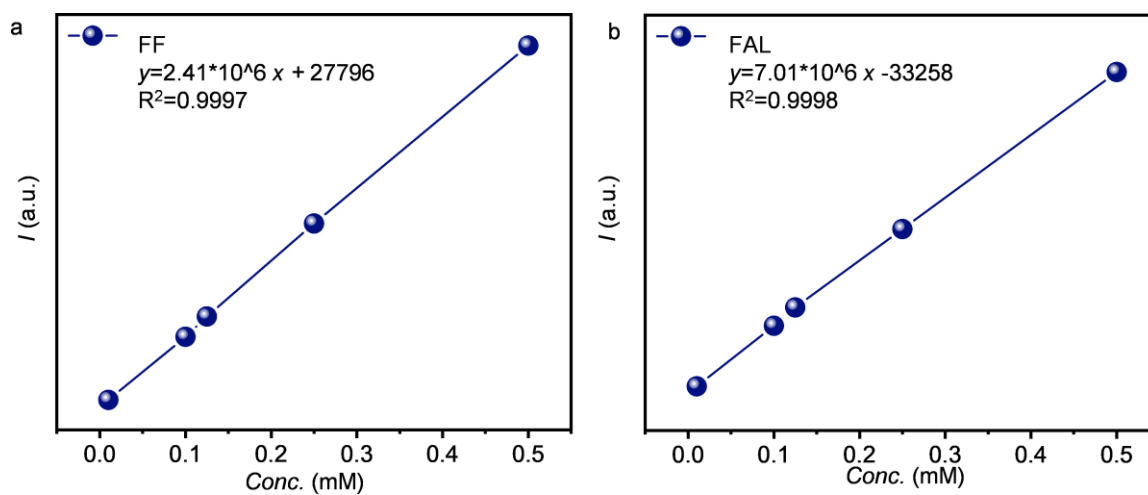

**Figure S27.** Calibration curves of HPLC for (a) FF and (b) FAL.

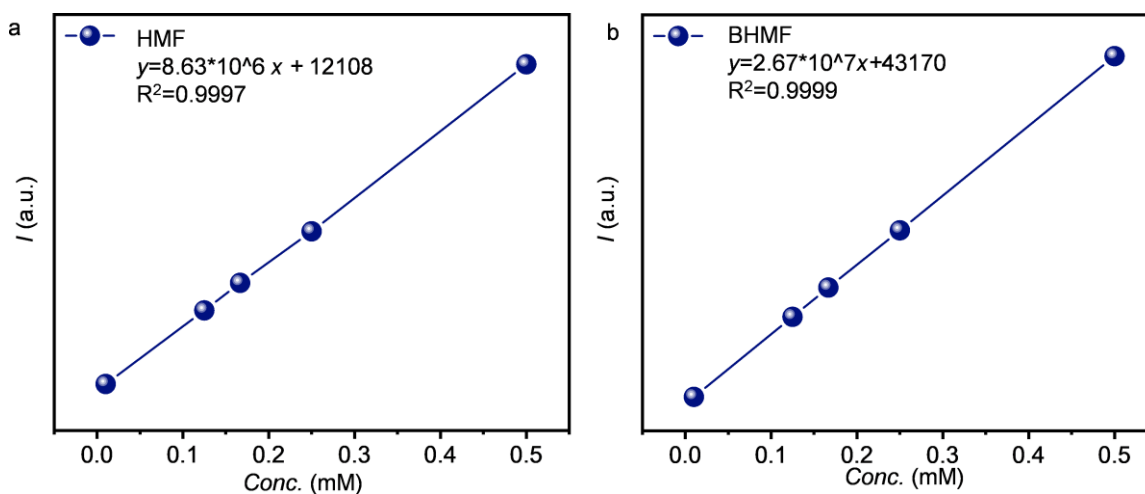

**Figure S28.** Calibration curves of HPLC for (a) HMF and (b) BHMF.

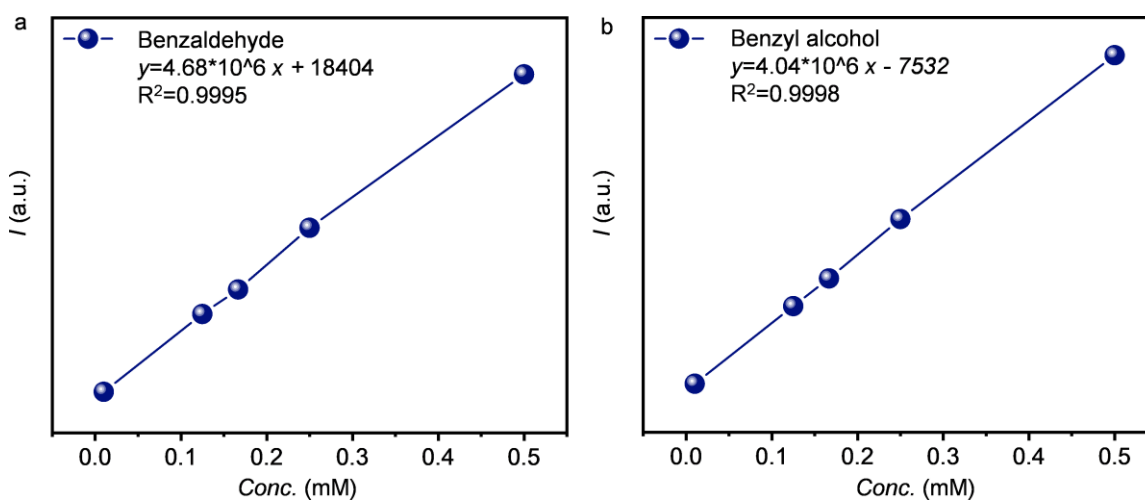

**Figure S29.** Calibration curves of HPLC for (a) Benzaldehyde and (b) Benzyl alcohol.

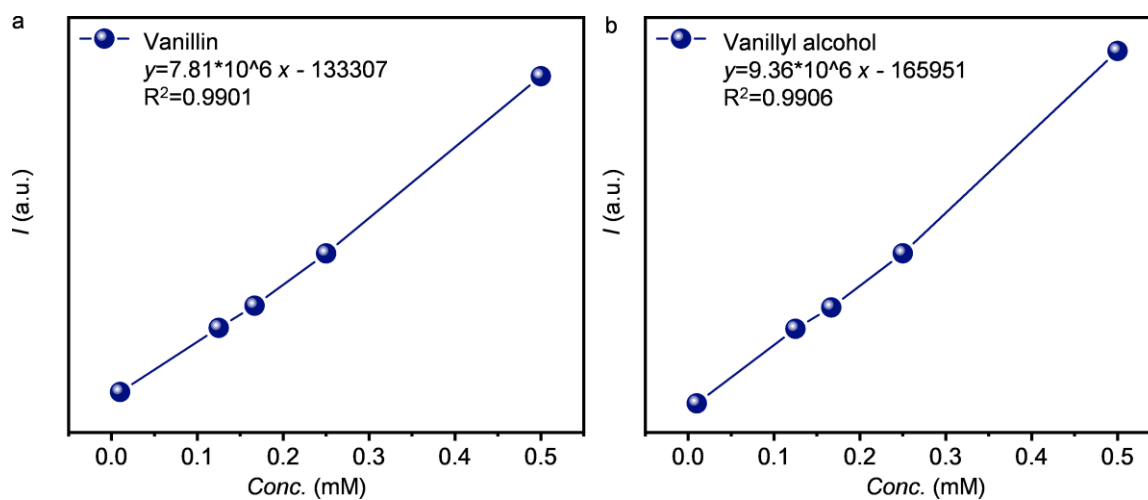

**Figure S30.** Calibration curves of HPLC for (a) Vanillin and (b) Vanillyl alcohol.

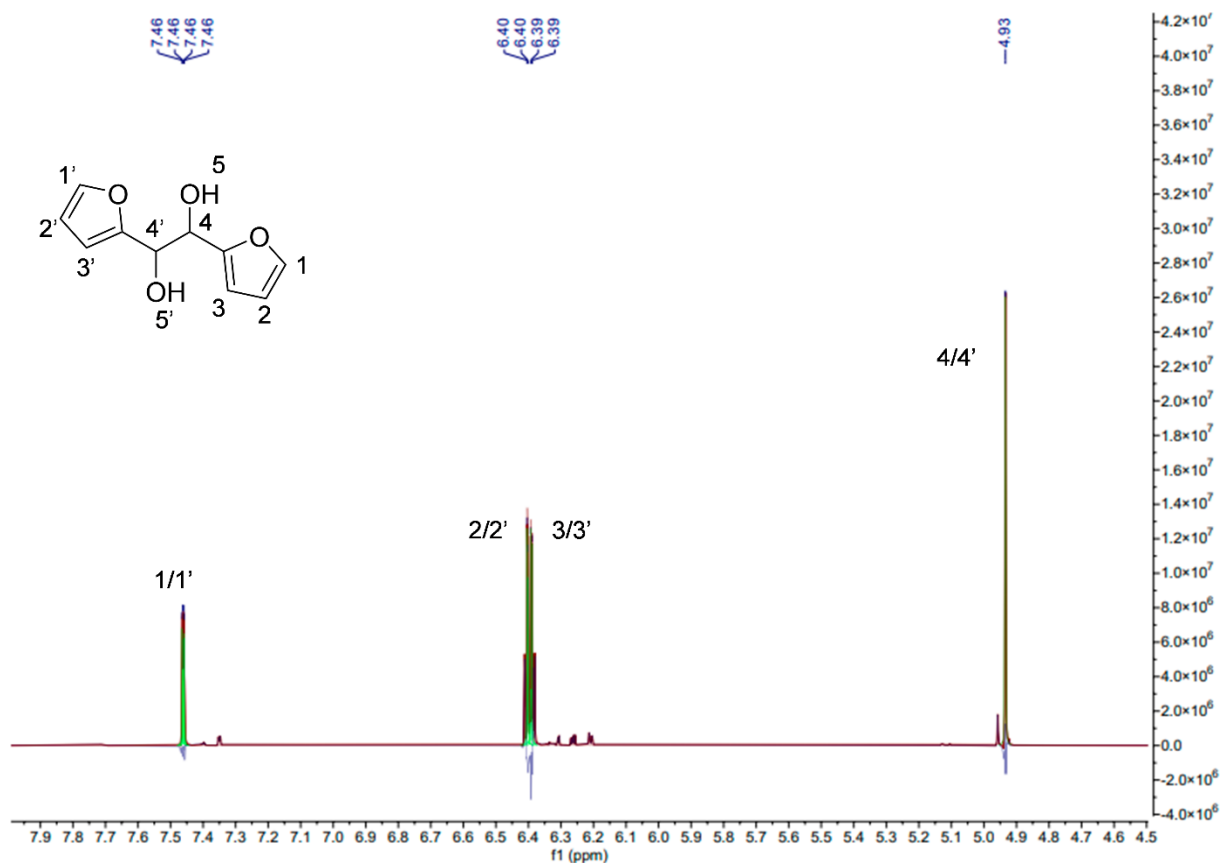

**Figure S31.**  $^1\text{H}$ -NMR spectra of the home-made HFN.

$^1\text{H}$  NMR (400 MHz,  $\text{H}_2\text{O}+\text{D}_2\text{O}$ )  $\delta$  7.46, 7.46, 7.46, 7.46, 6.40, 6.40, 6.39, 6.39, 4.93.

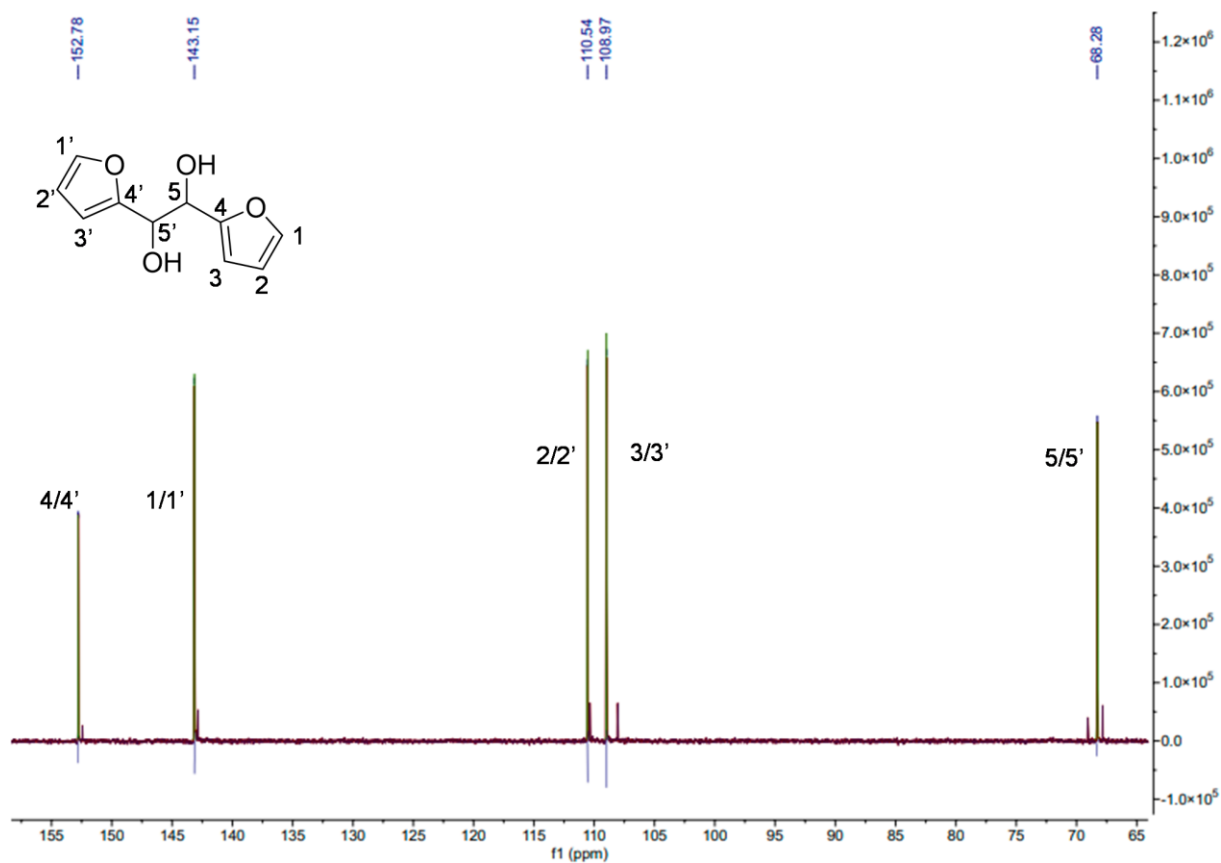

**Figure S32.**  $^{13}\text{C}$ -NMR spectra of the home-made HFN.

$^{13}\text{C}$  NMR (101 MHz,  $\text{H}_2\text{O}+\text{D}_2\text{O}$ )  $\delta$  152.78, 143.15, 110.54, 108.97, 68.28.

**Table S1.**  $C_{dl}$  and ECSA of CF and  $\text{Cu}_3\text{N}$  Nw/CF.

| Catalysts                   | $C_{dl}$ ( $\text{mF cm}^{-2}$ ) | ECSA ( $\text{cm}^2$ ) |
|-----------------------------|----------------------------------|------------------------|
| CF                          | 30.52                            | 678.2                  |
| $\text{Cu}_3\text{N}$ Nw/CF | 63.01                            | 1400.2                 |

**Table S2.** Optimum fit parameters for the electrochemical impedance spectra of CF in 0.1 M PBS.

| Electrolyte | Potential<br>(V vs.<br>RHE) | $R_s$ ( $\Omega$<br>$\text{cm}^2$ ) | CPE <sub>1</sub> -T | CPE <sub>2</sub> -P | $R_1$ ( $\Omega$<br>$\text{cm}^2$ ) | CPE <sub>1</sub> -T | CPE <sub>2</sub> -P | $R_2$ ( $\Omega$<br>$\text{cm}^2$ ) | CPE <sub>1</sub> -T | CPE <sub>2</sub> -P | $R_3$ ( $\Omega$<br>$\text{cm}^2$ ) |
|-------------|-----------------------------|-------------------------------------|---------------------|---------------------|-------------------------------------|---------------------|---------------------|-------------------------------------|---------------------|---------------------|-------------------------------------|
| 0.1M PBS    | -0.35                       | 22.92                               | 0.009656            | 0.5979              | 30.57                               | 0.008776            | 1.25                | 52.95                               | 0.002180            | 0.8377              | 135.4                               |
|             | -0.40                       | 22.1                                | 0.02649             | 0.1524              | 4.63                                | 0.008979            | 1.129               | 42.72                               | 0.001850            | 0.7828              | 81.69                               |
|             | -0.45                       | 22.56                               | 0.03062             | 0.1071              | 7.141                               | 0.097329            | 4.001               | 6.29                                | 0.001715            | 0.7958              | 31.28                               |
|             | -0.50                       | 23.9                                | 0.003630            | 0.7192              | 32.93                               | 0.008338            | 1.315               | 0.14                                | 0.004177            | 0.7964              | 21.38                               |
|             | -0.55                       | 22.53                               | 0.1957              | 0.1291              | 1.0818E7                            | 0.008256            | 1.245               | 0.26                                | 0.001758            | 0.8112              | 21.45                               |
|             | -0.60                       | 22.21                               | 0.1616              | 0.1347              | 3.2906E6                            |                     |                     |                                     | 0.001789            | 0.8205              | 16.97                               |
|             | -0.65                       | 22.14                               | 0.13808             | 0.1702              | 2.2279E7                            |                     |                     |                                     | 0.001782            | 0.8362              | 14.32                               |

**Table S3.** Optimum fit parameters for the electrochemical impedance spectra of CF in 0.1 M PBS with 20 mM FF.

| Electrolyte               | Potential<br>(V vs.<br>RHE) | $R_s$ ( $\Omega$<br>$\text{cm}^2$ ) | $CPE_{1-T}$ | $CPE_{2-P}$ | $R_1$ ( $\Omega$<br>$\text{cm}^2$ ) | $CPE_{1-T}$ | $CPE_{2-P}$ | $R_2$ ( $\Omega$<br>$\text{cm}^2$ ) | $CPE_{1-T}$ | $CPE_{2-P}$ | $R_3$ ( $\Omega$<br>$\text{cm}^2$ ) |
|---------------------------|-----------------------------|-------------------------------------|-------------|-------------|-------------------------------------|-------------|-------------|-------------------------------------|-------------|-------------|-------------------------------------|
| 0.1 M<br>PBS +20<br>mM FF | -0.35                       | 21.48                               | 0.001726    | 0.7431      | 62.09                               | 0.01802     | 0.8451      | 10.56                               | 0.04525     | 0.75539     | 42.26                               |
|                           | -0.40                       | 22.08                               | 0.09093     | 0.3142      | 38.76                               | 0.02965     | 0.005439    | 0.57                                | 0.001851    | 0.7642      | 12.19                               |
|                           | -0.45                       | 22.19                               | 0.007814    | 0.5614      | 34.06                               | 0.06468     | 0.04843     | 0.37                                | 0.001641    | 0.9107      | 14.85                               |
|                           | -0.50                       | 22.35                               | 0.001533    | 0.7619      | 32.03                               | 0.04948     | 0.06533     | 9.794                               | 0.07442     | 1.637       | 3.088                               |
|                           | -0.55                       | 22.37                               | 0.001364    | 0.7855      | 28.8                                | 0.05345     | 0.04635     | 6.586                               | 0.02121     | 1.304       | 2.582                               |
|                           | -0.60                       | 22.2                                | 0.001700    | 0.7455      | 25.88                               |             |             |                                     | 0.07236     | 1.322       | 2.672                               |
|                           | -0.65                       | 22.12                               | 0.001812    | 0.7355      | 18.4                                |             |             |                                     | 0.3466      | 1.005       | 1.16                                |

**Table S4.** Optimum fit parameters for the electrochemical impedance spectra of Cu<sub>3</sub>N Nw/CF in 0.1 M PBS.

| Electrolyte | Potential (V vs. RHE) | R <sub>s</sub> (Ω cm <sup>2</sup> ) | CPE <sub>1</sub> -T | CPE <sub>2</sub> -P | R <sub>1</sub> (Ω cm <sup>2</sup> ) | CPE <sub>1</sub> -T | CPE <sub>2</sub> -P | R <sub>2</sub> (Ω cm <sup>2</sup> ) | CPE <sub>1</sub> -T | CPE <sub>2</sub> -P | R <sub>3</sub> (Ω cm <sup>2</sup> ) |
|-------------|-----------------------|-------------------------------------|---------------------|---------------------|-------------------------------------|---------------------|---------------------|-------------------------------------|---------------------|---------------------|-------------------------------------|
| 0.1 M PBS   | -0.35                 | 22.23                               | 0.03901             | 0.7210              | 3.5425                              | 0.04335             | 0.7661              | 36.12                               | 0.04498             | 0.8508              | 52.85                               |
|             | -0.40                 | 22.17                               | 0.04099             | 0.6935              | 3.2023                              | 0.04167             | 0.80484             | 20.68                               | 0.04374             | 0.7541              | 28.12                               |
|             | -0.45                 | 22.12                               | 0.04420             | 0.6812              | 2.6532                              | 0.04008             | 0.7640              | 10.79                               | 0.04422             | 0.5318              | 26.24                               |
|             | -0.50                 | 21.96                               | 0.05076             | 0.6502              | 2.2623                              | 0.04176             | 0.8321              | 5.26                                | 0.04882             | 0.7954              | 17.67                               |
|             | -0.55                 | 21.84                               | 0.04795             | 0.6901              | 1.9665                              |                     |                     |                                     | 0.04441             | 0.8442              | 13.04                               |
|             | -0.60                 | 21.78                               | 0.05582             | 0.0558              | 1.6945                              |                     |                     |                                     | 0.05813             | 0.7303              | 7.84                                |
|             | -0.65                 | 21.75                               | 0.04566             | 0.7104              | 1.3934                              |                     |                     |                                     | 0.05103             | 0.8308              | 6.79                                |

**Table S5.** Optimum fit parameters for the electrochemical impedance spectra of Cu<sub>3</sub>N Nw/CF in 0.1 M PBS. with 20 mM FF.

| Electrolyte               | Potential<br>(V vs.<br>RHE) | R <sub>s</sub> (Ω<br>cm <sup>2</sup> ) | CPE <sub>1</sub> -T | CPE <sub>2</sub> -P | R <sub>1</sub> (Ω<br>cm <sup>2</sup> ) | CPE <sub>1</sub> -T | CPE <sub>2</sub> -P | R <sub>2</sub> (Ω<br>cm <sup>2</sup> ) | CPE <sub>1</sub> -T | CPE <sub>2</sub> -P | R <sub>3</sub> (Ω<br>cm <sup>2</sup> ) |
|---------------------------|-----------------------------|----------------------------------------|---------------------|---------------------|----------------------------------------|---------------------|---------------------|----------------------------------------|---------------------|---------------------|----------------------------------------|
| 0.1 M<br>PBS +20<br>mM FF | -0.35                       | 21.48                                  | 0.0006120           | 3.769               | 2.95                                   | 0.09101             | 0.04724             | 29.96                                  | 0.05444             | 0.6524              | 40.70                                  |
|                           | -0.40                       | 21.51                                  | 0.0003450           | 3.456               | 2.55                                   | 2.006               | 3.413               | 15.67                                  | 0.043308            | 0.6938              | 28.01                                  |
|                           | -0.45                       | 21.99                                  | 0.0003433           | 3.917               | 2.03                                   | 0.06785             | 2.323               | 8.45                                   | 0.05638             | 0.6435              | 27.24                                  |
|                           | -0.50                       | 21.44                                  | 0.1719              | 0.4822              | 1.67                                   | 0.03576             | 3.950               | 1.556                                  | 0.03445             | 0.8321              | 5.539                                  |
|                           | -0.55                       | 21.46                                  | 0.1889              | 0.5009              | 1.56                                   |                     |                     |                                        | 0.03162             | 0.8161              | 4.358                                  |
|                           | -0.60                       | 21.45                                  | 0.03802             | 0.6931              | 1.18                                   |                     |                     |                                        | 0.1192              | 1.332               | 4.658                                  |
|                           | -0.65                       | 21.56                                  | 0.03072             | 0.76075             | 0.56                                   |                     |                     |                                        | 0.06256             | 0.8053              | 3.824                                  |



## Reference

- (1) Lopez-Ruiz, J. A.; Sanyal, U.; Egbert, J.; Gutiérrez, O. Y.; Holladay, J., *ACS Sustain. Chem. Eng.* **2018**, *6* (12), 16073-16085.
